# Supplementary material for: MicroRNA Mediating Networks in Granulosa Cells Associated with Ovarian Follicular Development
Source: Biomed Res Int. 2017 Feb 19;2017:4585213. doi: 10.1155/2017/4585213 (PMC5337806; doi:10.1155/2017/4585213)
Supplement: Supplementary file 1 — The Supplementary Material include 7 tables. The Supplementary Table 1 list the miRNAs down-regulated in DFs and associated pathways compared with small health follicles and large atretic follicles. The Supplementary Table 2 list the pathways regulated by both up- and down- regulated miRNAs in DFs compared with small health follicles and large atretic follicles. The Supplementary Table 3 list the abundant miRNAs both in DFs and SFs and associated pathways. The Supplementary Table 4 list the deregulated miRNAs in Both Two GSEdatabases. The Supplementary Table 5 list the up and down-regulated miRNAs in DFs and associated pathways. The Supplementary Table 6 list the analyses of every note in miRNA-TF network of DFs compared with SFs. The Supplementary Table 7 list the analyses of every note in miRNA-TF network of DFs compared with both small health follicles and large atretic follicles. [file 4585213.f1.xlsx]

## Sheet: S1
							miRNAs Down-regulated in DFs Compared with Small Health Follicles and Large Atretic Follicles and assosiated pathways
	miR-3178					miR-1275							miR-625-3p						miR-3621		miR-483-3p							miR-1469			miR-498					miR-4279
	Regulation of actin cytoskeleton					Glycosaminoglycan biosynthesis - chondroitin sulfate							Drug metabolism - cytochrome P450								RNA degradation							RNA degradation			Mucin type O-Glycan biosynthesis					Spliceosome
	Adherens junction					Tight junction							Mucin type O-Glycan biosynthesis								RNA transport										GABAergic synapse					ECM-receptor interaction
	Synaptic vesicle cycle					Cell adhesion molecules (CAMs)							Protein processing in endoplasmic reticulum								Transcriptional misregulation in cancer										Nicotine addiction					N-Glycan biosynthesis
	Olfactory transduction					Synaptic vesicle cycle							Neurotrophin signaling pathway								Type II diabetes mellitus										Viral carcinogenesis					DNA replication
						mRNA surveillance pathway							Osteoclast differentiation								Glycine, serine and threonine metabolism										Prostate cancer					Lysine degradation
						PI3K-Akt signaling pathway							Long-term potentiation								Influenza A										Hypertrophic cardiomyopathy (HCM)					GnRH signaling pathway
						Leukocyte transendothelial migration							GABAergic synapse								Arrhythmogenic right ventricular cardiomyopathy (ARVC)										TGF-beta signaling pathway					Gap junction
						GABAergic synapse							Maturity onset diabetes of the young								Salmonella infection										Long-term depression					Dilated cardiomyopathy
						Dopaminergic synapse							Retinol metabolism								Toll-like receptor signaling pathway										Regulation of actin cytoskeleton					MAPK signaling pathway
						Morphine addiction							MAPK signaling pathway								Valine, leucine and isoleucine degradation										Regulation of autophagy					ErbB signaling pathway
						Retrograde endocannabinoid signaling															Epstein-Barr virus infection										Dilated cardiomyopathy					Amoebiasis
						Basal cell carcinoma															Pantothenate and CoA biosynthesis										RNA transport					HTLV-I infection
						Dilated cardiomyopathy															RIG-I-like receptor signaling pathway										Cell cycle					Endocytosis
						Hedgehog signaling pathway															Fc epsilon RI signaling pathway										Small cell lung cancer
						Circadian entrainment															One carbon pool by folate										ErbB signaling pathway
						Melanogenesis															Glycolysis / Gluconeogenesis										Adipocytokine signaling pathway
						Vibrio cholerae infection															Pertussis										MAPK signaling pathway
						Bile secretion															Progesterone-mediated oocyte maturation										Retrograde endocannabinoid signaling
						Taste transduction															Nucleotide excision repair										Carbohydrate digestion and absorption
						Lysine degradation															Aldosterone-regulated sodium reabsorption										Long-term potentiation
						Histidine metabolism															GnRH signaling pathway										Endocrine and other factor-regulated calcium reabsorption
						mTOR signaling pathway															Basal transcription factors										Melanogenesis
						Wnt signaling pathway																									Glioma
						Hypertrophic cardiomyopathy (HCM)																									Peroxisome
																															Bacterial invasion of epithelial cells
																															Pantothenate and CoA biosynthesis
																															RNA degradation
																															Cholinergic synapse
																															Gastric acid secretion
																															mRNA surveillance pathway
																															HIF-1 signaling pathway
																															mTOR signaling pathway
																															Fc gamma R-mediated phagocytosis
																															Morphine addiction
																															Hematopoietic cell lineage
							miRNAs Up-regulated in DFs Compared with Small Health Follicles and Large Atretic Follicles and assosiated pathways
	miR-202						miR-876-5p							miR-876-3p							miR-873-5p							miR-451a						miR-144-3p								miR-652-3p
	Acute myeloid leukemia						Fatty acid metabolism							Lysine degradation							Mucin type O-Glycan biosynthesis							mTOR signaling pathway						Dopaminergic synapse								Oxidative phosphorylation
	Colorectal cancer						Long-term potentiation							Cysteine and methionine metabolism							Circadian rhythm							Proteasome						Endocrine and other factor-regulated calcium reabsorption								Tight junction
	Pancreatic cancer						Colorectal cancer							Cocaine addiction							Ubiquinone and other terpenoid-quinone biosynthesis							Protein export						Gap junction								Toll-like receptor signaling pathway
	Endometrial cancer						Maturity onset diabetes of the young							PI3K-Akt signaling pathway							RNA transport							Glyoxylate and dicarboxylate metabolism						MAPK signaling pathway								Alzheimer's disease
	Drug metabolism - cytochrome P450						Endometrial cancer							Vasopressin-regulated water reabsorption							Purine metabolism							Propanoate metabolism						Serotonergic synapse								Parkinson's disease
	Chronic myeloid leukemia						Mucin type O-Glycan biosynthesis							Hepatitis C							RNA polymerase							Valine, leucine and isoleucine degradation						Glutamatergic synapse								Huntington's disease
	Non-small cell lung cancer						Vascular smooth muscle contraction							Viral carcinogenesis							Folate biosynthesis							Viral myocarditis						Wnt signaling pathway
	Hepatitis B						Wnt signaling pathway							Histidine metabolism							MAPK signaling pathway							Bacterial invasion of epithelial cells						GnRH signaling pathway
	Glioma						Tryptophan metabolism							D-Glutamine and D-glutamate metabolism							Neurotrophin signaling pathway							Small cell lung cancer						Axon guidance
	Prostate cancer						Melanogenesis							Folate biosynthesis							Phenylalanine, tyrosine and tryptophan biosynthesis							ErbB signaling pathway						Focal adhesion
	Melanoma						Collecting duct acid secretion							Regulation of autophagy														TGF-beta signaling pathway						Colorectal cancer
	Pathways in cancer						Mismatch repair							Neurotrophin signaling pathway														Insulin signaling pathway						PI3K-Akt signaling pathway
	Peroxisome						Protein processing in endoplasmic reticulum							SNARE interactions in vesicular transport														Spliceosome						ErbB signaling pathway
	Fatty acid metabolism						Dopaminergic synapse							Herpes simplex infection														Cell cycle						Inositol phosphate metabolism
	mTOR signaling pathway						mRNA surveillance pathway							Phenylalanine, tyrosine and tryptophan biosynthesis																				Long-term potentiation
	PI3K-Akt signaling pathway						African trypanosomiasis							Glycosphingolipid biosynthesis - ganglio series																				Retrograde endocannabinoid signaling
	Aldosterone-regulated sodium reabsorption						Basal cell carcinoma							Basal cell carcinoma																				Lysine degradation
	Adherens junction						Lysine degradation							Ubiquitin mediated proteolysis																				Dorso-ventral axis formation
	ErbB signaling pathway						Circadian rhythm							Tight junction																				Cholinergic synapse
	Osteoclast differentiation						Melanoma							Maturity onset diabetes of the young																				Type II diabetes mellitus
	Fc epsilon RI signaling pathway						Alcoholism																											Phosphatidylinositol signaling system
	Basal transcription factors																																	Pancreatic secretion
	T cell receptor signaling pathway																																	Chemokine signaling pathway
	B cell receptor signaling pathway																																	Long-term depression
																																		Melanogenesis
																																		Maturity onset diabetes of the young
																																		Neurotrophin signaling pathway
																																		Non-small cell lung cancer
																																		Adipocytokine signaling pathway
																																		Endometrial cancer
																																		Arrhythmogenic right ventricular cardiomyopathy (ARVC)
																																		Leukocyte transendothelial migration
																																		Pancreatic cancer
																																		Hepatitis C
																																		Regulation of actin cytoskeleton
																																		Salivary secretion

## Sheet: S2
Pathways Regulated by Both Up- and Down- regulated miRNAs in DFs Comparied with Small Health Follicles and Large Atretic Follicles
		Pathway ID					Down-regulated miRNAs					Up-regulated miRNAs
		Melanogenesis					miR-1275	miR-498				miR-876-5p	miR-144-3p
		Lysine degradation					miR-1275	miR-4279				miR-876-5p	miR-876-3p	miR-144-3p
		mTOR signaling pathway					miR-1275	miR-498				bta-miR-202	miR-451a
		Mucin type O-Glycan biosynthesis					miR-625-3p	miR-498				miR-876-5p	miR-873-5p
		Long-term potentiation					miR-625-3p	miR-498				miR-876-5p	miR-144-3p
		MAPK signaling pathway					miR-625-3p	miR-498	miR-4279			miR-873-5p	miR-144-3p
		ErbB signaling pathway					miR-498	miR-4279				bta-miR-202	miR-451a	miR-144-3p

## Sheet: S3
						Abundant miRNAs both in DFs and SFs and associated pathways
			miR-26a							miR-10b				let-7a-5p						let-7f						let-7i						miR-27b					miR-191
		Glycosaminoglycan biosynthesis - chondroitin sulfate							Maturity onset diabetes of the young					ECM-receptor interaction						ECM-receptor interaction						ECM-receptor interaction						ErbB signaling pathway					Nicotine addiction
		Long-term potentiation							D-Glutamine and D-glutamate metabolism					Glycosaminoglycan biosynthesis - chondroitin sulfate						Glycosaminoglycan biosynthesis - chondroitin sulfate						Glycosaminoglycan biosynthesis - chondroitin sulfate						GnRH signaling pathway					Calcium signaling pathway
		mTOR signaling pathway							Long-term potentiation					PI3K-Akt signaling pathway						Amoebiasis						Amoebiasis						PI3K-Akt signaling pathway					Serotonergic synapse
		MAPK signaling pathway							Dopaminergic synapse					Amoebiasis						PI3K-Akt signaling pathway						PI3K-Akt signaling pathway						Focal adhesion					GABAergic synapse
		Wnt signaling pathway							Mismatch repair					p53 signaling pathway						Focal adhesion						Protein digestion and absorption						Glutamatergic synapse					RNA transport
		Endocrine and other factor-regulated calcium reabsorption							mRNA surveillance pathway					Focal adhesion						MAPK signaling pathway						p53 signaling pathway						MAPK signaling pathway					Dopaminergic synapse
		Inositol phosphate metabolism							Wnt signaling pathway					Transcriptional misregulation in cancer						Protein digestion and absorption						Hepatitis B						Long-term potentiation					Hematopoietic cell lineage
		RNA transport							Chemokine signaling pathway					MAPK signaling pathway						Valine, leucine and isoleucine biosynthesis						Valine, leucine and isoleucine biosynthesis						Neurotrophin signaling pathway					Insulin signaling pathway
		Ubiquitin mediated proteolysis							Colorectal cancer					Hepatitis B						Hypertrophic cardiomyopathy (HCM)						Focal adhesion						Fc epsilon RI signaling pathway					Gastric acid secretion
		mRNA surveillance pathway							Focal adhesion					Protein digestion and absorption						Hepatitis B						Wnt signaling pathway						Insulin signaling pathway					Morphine addiction
		PI3K-Akt signaling pathway							Hedgehog signaling pathway					Chronic myeloid leukemia						Dilated cardiomyopathy						Basal cell carcinoma						Amphetamine addiction					Transcriptional misregulation in cancer
		ErbB signaling pathway							Axon guidance					Valine, leucine and isoleucine biosynthesis						Transcriptional misregulation in cancer						MAPK signaling pathway						Glioma					Alzheimer's disease
		Basal transcription factors							Fanconi anemia pathway					HTLV-I infection						Pathways in cancer						HTLV-I infection						Wnt signaling pathway					Renin-angiotensin system
		Pathways in cancer							Antigen processing and presentation					Bladder cancer						p53 signaling pathway						Transcriptional misregulation in cancer						Melanogenesis					Primary immunodeficiency
		Cell cycle							Insulin signaling pathway					Hypertrophic cardiomyopathy (HCM)						HTLV-I infection						Adipocytokine signaling pathway						mTOR signaling pathway					Retrograde endocannabinoid signaling
		Influenza A							Pathogenic Escherichia coli infection					Pathways in cancer						Adipocytokine signaling pathway						Melanoma						Lysine degradation					Huntington's disease
		Dopaminergic synapse							Transcriptional misregulation in cancer					Dilated cardiomyopathy						Wnt signaling pathway						Hypertrophic cardiomyopathy (HCM)						Aldosterone-regulated sodium reabsorption					Pyrimidine metabolism
		Phosphatidylinositol signaling system							Basal cell carcinoma					Basal cell carcinoma						Glycosaminoglycan biosynthesis - keratan sulfate						Glycosaminoglycan biosynthesis - keratan sulfate						Gastric acid secretion					Protein processing in endoplasmic reticulum
		Protein processing in endoplasmic reticulum							Glutamatergic synapse					Wnt signaling pathway						Mucin type O-Glycan biosynthesis						Chronic myeloid leukemia						Dopaminergic synapse
		Axon guidance							Shigellosis					Apoptosis						Type II diabetes mellitus						Mucin type O-Glycan biosynthesis						TGF-beta signaling pathway
		Tight junction							Ribosome biogenesis in eukaryotes					Viral myocarditis						Apoptosis						Type II diabetes mellitus						Alanine, aspartate and glutamate metabolism
		Pancreatic secretion							B cell receptor signaling pathway					TGF-beta signaling pathway						mTOR signaling pathway						Bladder cancer						T cell receptor signaling pathway
		Protein digestion and absorption							Allograft rejection					Adipocytokine signaling pathway						Cytokine-cytokine receptor interaction						Dilated cardiomyopathy						p53 signaling pathway
		Viral myocarditis							MAPK signaling pathway					Amyotrophic lateral sclerosis (ALS)						HIF-1 signaling pathway						Pathways in cancer						Fc gamma R-mediated phagocytosis
		p53 signaling pathway												Melanoma						TGF-beta signaling pathway						mTOR signaling pathway						Retrograde endocannabinoid signaling
		TGF-beta signaling pathway												Glycosaminoglycan biosynthesis - keratan sulfate						Insulin signaling pathway						Cytokine-cytokine receptor interaction						Calcium signaling pathway
		Proximal tubule bicarbonate reclamation												Type II diabetes mellitus						Basal cell carcinoma												Cholinergic synapse
		Viral carcinogenesis												Colorectal cancer						Chronic myeloid leukemia												Regulation of actin cytoskeleton
		Amyotrophic lateral sclerosis (ALS)																														Osteoclast differentiation
		Melanoma																														Chronic myeloid leukemia
		Insulin signaling pathway																														Circadian entrainment
																																Nicotine addiction
																																Endometrial cancer
																																Neuroactive ligand-receptor interaction
																																Other types of O-glycan biosynthesis
																																Axon guidance
																																Pathways in cancer
																																Acute myeloid leukemia
																																Synaptic vesicle cycle
																																Transcriptional misregulation in cancer

## Sheet: S4
			Deregulated miRNAs in Both Two GSEdatabases
			GSE56002				GSE55987
	Up-regulated miRNA ID		Fold change	p-value	FDR		Fold change	p-value	FDR
	miR-183		7.03	＜0.0001	＜0.0001		1.30	0.00200	0.02600
	miR-708		3.56	＜0.0001	＜0.0001		3.70	＜0.0001	＜0.0001
	miR-34c		2.15	0.00570	0.04220		2.50	0.00500	0.06700
	miR-21-3p		1.85	＜0.0001	0.00060		3.00	＜0.0001	＜0.0001
	miR-221		1.58	＜0.0001	＜0.0001		3.70	＜0.0001	＜0.0001
			GSE56002				GSE55987
	Down-regulated miRNA ID		Fold change	p-value	FDR		Fold change	p-value	FDR
	miR-409a		-16.43	0.00970	0.06420		-16.5	0.00418	0.02198
	miR-335		-4.35	＜0.0001	＜0.0001		-1.20	＜0.0001	＜0.0001
	miR-449a		-3.88	0.00010	0.00110		-4.00	＜0.0001	＜0.0001
	miR-214		-1.25	0.01060	0.06820		-1.30	0.00600	0.07800
	miR-224		-1.05	0.00170	0.01530		-3.60	＜0.0001	＜0.0001

## Sheet: S5
							Up-regulated miRNAs in DFs and associated pathways
		bta-miR-183							bta-miR-34c				bta-miR-708						bta-miR-21-3p							bta-miR-221
	Glycosaminoglycan biosynthesis - chondroitin sulfate							Adherens junction					Phototransduction						Gap junction							Fatty acid elongation
	Fat digestion and absorption							Other glycan degradation					p53 signaling pathway						Long-term depression							Glycosaminoglycan biosynthesis - keratan sulfate
	Ubiquinone and other terpenoid-quinone biosynthesis							Notch signaling pathway					TGF-beta signaling pathway						Glycosaminoglycan biosynthesis - keratan sulfate							ECM-receptor interaction
	T cell receptor signaling pathway							N-Glycan biosynthesis					Glycosphingolipid biosynthesis - ganglio series						Long-term potentiation							Endocrine and other factor-regulated calcium reabsorption
	Vitamin digestion and absorption							Cell cycle					Adherens junction						Cell adhesion molecules (CAMs)							Folate biosynthesis
	Neurotrophin signaling pathway							Sphingolipid metabolism					Neuroactive ligand-receptor interaction						Glutamatergic synapse							Other types of O-glycan biosynthesis
	Glioma							Prostate cancer					Wnt signaling pathway						Ubiquitin mediated proteolysis							VEGF signaling pathway
	Endometrial cancer							Synaptic vesicle cycle					Hepatitis B						GnRH signaling pathway
	MAPK signaling pathway							Fc gamma R-mediated phagocytosis					Oocyte meiosis						Gastric acid secretion
	Axon guidance							Dorso-ventral axis formation					Axon guidance						TGF-beta signaling pathway
	p53 signaling pathway							Circadian rhythm					Ubiquitin mediated proteolysis						Hepatitis B
	B cell receptor signaling pathway							SNARE interactions in vesicular transport					Mucin type O-Glycan biosynthesis						Mineral absorption
	Bacterial invasion of epithelial cells							Cell adhesion molecules (CAMs)					GABAergic synapse						Dopaminergic synapse
	Tuberculosis							ErbB signaling pathway					HTLV-I infection						Oocyte meiosis
	Focal adhesion							Gap junction					Colorectal cancer						Lysosome
	Renal cell carcinoma							Wnt signaling pathway					Protein processing in endoplasmic reticulum						Other types of O-glycan biosynthesis
	Prostate cancer							Dopaminergic synapse											Glycosphingolipid biosynthesis - ganglio series
								Bladder cancer											Base excision repair
								Natural killer cell mediated cytotoxicity											Herpes simplex infection
																			Arrhythmogenic right ventricular cardiomyopathy (ARVC)
																			Cocaine addiction
							Down-regulated miRNAs in DFs and associated pathways
	bta-miR-409a					bta-miR-335						bta-miR-449a				bta-miR-214							bta-miR-224
	mRNA surveillance pathway					PI3K-Akt signaling pathway						Viral carcinogenesis				Pathways in cancer							Wnt signaling pathway
	Biosynthesis of unsaturated fatty acids					Prostate cancer						Melanoma				Endometrial cancer							TGF-beta signaling pathway
	Gap junction					Focal adhesion						Non-small cell lung cancer				Glycosphingolipid biosynthesis - lacto and neolacto series							Focal adhesion
	Long-term potentiation					Ubiquitin mediated proteolysis						Chronic myeloid leukemia				Pancreatic cancer							Regulation of actin cytoskeleton
	Transcriptional misregulation in cancer					Glioma						Cell cycle				mTOR signaling pathway							Ubiquitin mediated proteolysis
	TGF-beta signaling pathway					Melanoma						Glioma				Mineral absorption							PI3K-Akt signaling pathway
	mTOR signaling pathway					Transcriptional misregulation in cancer						Pathways in cancer				Chronic myeloid leukemia							mRNA surveillance pathway
	Collecting duct acid secretion					Endometrial cancer						Small cell lung cancer				Glycerophospholipid metabolism							Hedgehog signaling pathway
	PI3K-Akt signaling pathway					Calcium signaling pathway						p53 signaling pathway				Melanoma							One carbon pool by folate
	Synaptic vesicle cycle					Gap junction						Pancreatic cancer				Colorectal cancer							Transcriptional misregulation in cancer
	Dopaminergic synapse					HIF-1 signaling pathway						Bladder cancer				Small cell lung cancer							Glycosaminoglycan biosynthesis - chondroitin sulfate
	Non-small cell lung cancer					ErbB signaling pathway						Measles				ErbB signaling pathway							Folate biosynthesis
	Glycosylphosphatidylinositol(GPI)-anchor biosynthesis					mTOR signaling pathway						Hepatitis B				Pancreatic secretion							Neurotrophin signaling pathway
	Neurotrophin signaling pathway					Regulation of actin cytoskeleton						PI3K-Akt signaling pathway				Prostate cancer							Colorectal cancer
	Aldosterone-regulated sodium reabsorption					TGF-beta signaling pathway						Colorectal cancer				Hepatitis B							Chronic myeloid leukemia
	ErbB signaling pathway					Non-small cell lung cancer						Thyroid cancer				PI3K-Akt signaling pathway							ErbB signaling pathway
	Endometrial cancer					Acute myeloid leukemia										NF-kappa B signaling pathway							Maturity onset diabetes of the young
	Colorectal cancer					Small cell lung cancer										Ether lipid metabolism							Glioma
	RNA degradation					Pathways in cancer										MAPK signaling pathway							Insulin signaling pathway
	Ubiquitin mediated proteolysis					Aldosterone-regulated sodium reabsorption										Focal adhesion							Prostate cancer
						mRNA surveillance pathway										Wnt signaling pathway							Axon guidance
						Neurotrophin signaling pathway										Pathogenic Escherichia coli infection							Endocrine and other factor-regulated calcium reabsorption
						p53 signaling pathway										Hepatitis C							B cell receptor signaling pathway
						Arrhythmogenic right ventricular cardiomyopathy (ARVC)										Neurotrophin signaling pathway							Pathways in cancer
						Dopaminergic synapse										Long-term depression							HTLV-I infection
						Phosphatidylinositol signaling system										Regulation of actin cytoskeleton							Basal cell carcinoma
						Biotin metabolism										Insulin signaling pathway							Renal cell carcinoma
						Cholinergic synapse										Vascular smooth muscle contraction
						Hypertrophic cardiomyopathy (HCM)										p53 signaling pathway
						Fanconi anemia pathway										Bladder cancer
						Renal cell carcinoma										Non-small cell lung cancer
						Long-term potentiation										Type II diabetes mellitus
						Inositol phosphate metabolism										Thyroid cancer
						MAPK signaling pathway										Axon guidance
						Wnt signaling pathway										B cell receptor signaling pathway
						Chronic myeloid leukemia										Chagas disease (American trypanosomiasis)
						Nicotine addiction										Osteoclast differentiation
						Neuroactive ligand-receptor interaction										Basal cell carcinoma
						Dilated cardiomyopathy										Lysine degradation
						Protein processing in endoplasmic reticulum										T cell receptor signaling pathway
						Amoebiasis										TGF-beta signaling pathway
						Viral carcinogenesis										Oocyte meiosis
						Pancreatic cancer										Long-term potentiation
						Folate biosynthesis										Endocrine and other factor-regulated calcium reabsorption
						RNA transport										Calcium signaling pathway
						Dorso-ventral axis formation										Acute myeloid leukemia
						Butanoate metabolism
						Apoptosis
						Insulin signaling pathway
						T cell receptor signaling pathway
						Axon guidance
						Serotonergic synapse

## Sheet: S6
Analyses of every note in miRNA-TF network of DFs compared with SFs
	Note ID	Average shortest path length	Degree	Neighborhood connectivity
	miR-21-3p	2.13636	13	3.41667
	miR-26a	2.40909	12	3.33333
	miR-335	2.59091	12	2.36364
	miR-10b	2.27273	11	4.18182
	miR-27b	2.59091	10	3.4
	SMAD5	2.15909	7	11.2
	SMAD2	2.34091	6	8.16667
	SMAD4	2.34091	6	8
	Ptch1	2.61364	6	5.66667
	SMAD3	2.47727	5	8.2
	Hnrnpk	2.52273	4	8.5
	miR-214	3.13636	4	4.25
	Ets1	2.43182	4	11
	Ntrk2	3.02273	4	5
	Kit	2.61364	3	8.33333
	let-7i	3.45455	3	4.33333
	Ngf	4.34091	3	2.33333
	NFYA	2.79545	3	11
	GATA6	3.20455	2	11
	Elf1	2.97727	2	11.5
	miR-409a	3	2	5
	STAT3	3.02273	2	8
	FOXO1	3.20455	2	11
	FOXO3	2.84091	2	11.5
	SMAD1	2.75	2	12
	miR-224	3.22727	2	6
	miR-708	3.31818	2	4.5
	miR-221	3.54545	2	2.5
	let-7a-5p	3.54545	2	4.5
	let-7f	3.54545	2	4.5
	CEBPB	3.06818	2	6.5
	MIDN	3.52273	2	6.5
	BRCA1	2.97727	2	11.5
	LHX8	3.56818	1	10
	FOXL2	3.56818	1	10
	FOXO4	3.11364	1	12
	miR-34c	3.31818	1	6
	miR-191	4.04545	1	2
	SRF	3.11364	1	12
	NCOR1	3.56818	1	11
	BRCA2	3.56818	1	11
	POU5F1	3.56818	1	11
	STAT1	3.25	1	11
	Taf4b	3.56818	1	11
	HIF1A	3.38636	1	12
		Average degree of every TF note=2.63

## Sheet: S7
Analyses of every note in miRNA-TF network of DFs compared with both small health follicles and large atretic follicles
	Note ID	Average shortest path length	Degree	Neighborhood connectivity
	miR-4279	1.95238	18	2.88889
	miR-498	2.04762	17	3.11765
	miR-1275	2.19048	13	3.23077
	miR-625-3p	2.28571	12	3.08333
	miR-876-3p	2.42857	9	3.33333
	miR-144-3p	2.80952	5	2.8
	miR-3178	2.7619	5	2.4
	STAT3	2.16667	5	11.6
	SMAD2	2.07143	5	12.2
	Ets1	2.35714	4	11.75
	Ntrk2	2.40476	4	11
	Ptch1	2.35714	4	11.75
	SRF	2.21429	4	14.25
	BRCA1	2.21429	4	14.25
	HIF1A	2.21429	4	14
	GATA6	2.35714	3	16
	NR5A1	2.35714	3	14.6667
	Hnrnpk	2.5	3	14
	FOXO3	2.40476	3	15.6667
	NFYA	2.35714	3	16
	MIDN	2.54762	3	11.6667
	STAT1	2.5	3	11.6667
	SOHLH2	3.16667	2	7
	FOXL2	2.7381	2	11.5
	NR4A1	2.78571	2	12.5
	SMAD3	2.88095	2	11
	SMAD4	2.54762	2	17.5
	SMAD5	2.64286	2	15
	Taf4b	2.64286	2	15
	Elf1	3.40476	1	9
	LHX8	3.2619	1	12
	miR-202	3.14286	1	5
	FOXO4	3.16667	1	13
	MSX1	3.78571	1	5
	SMAD1	3.02381	1	17
	Figla	3.02381	1	17
	Kit	3.02381	1	17
	miR-876-5p	3.38095	1	4
	CEBPB	3.7381	1	5
	NCOR1	2.92857	1	18
	NANOG	3.7381	1	5
	SOX2	2.92857	1	18
	Gli1	2.92857	1	18
		Average degree of TF notes=2.38
